# Supplementary material
Source: Springer Nature journal article supplement (https://www.springermedizin.de/resource/supplementary/12885_2013_4675_MOESM2_ESM.pdf/9466952)

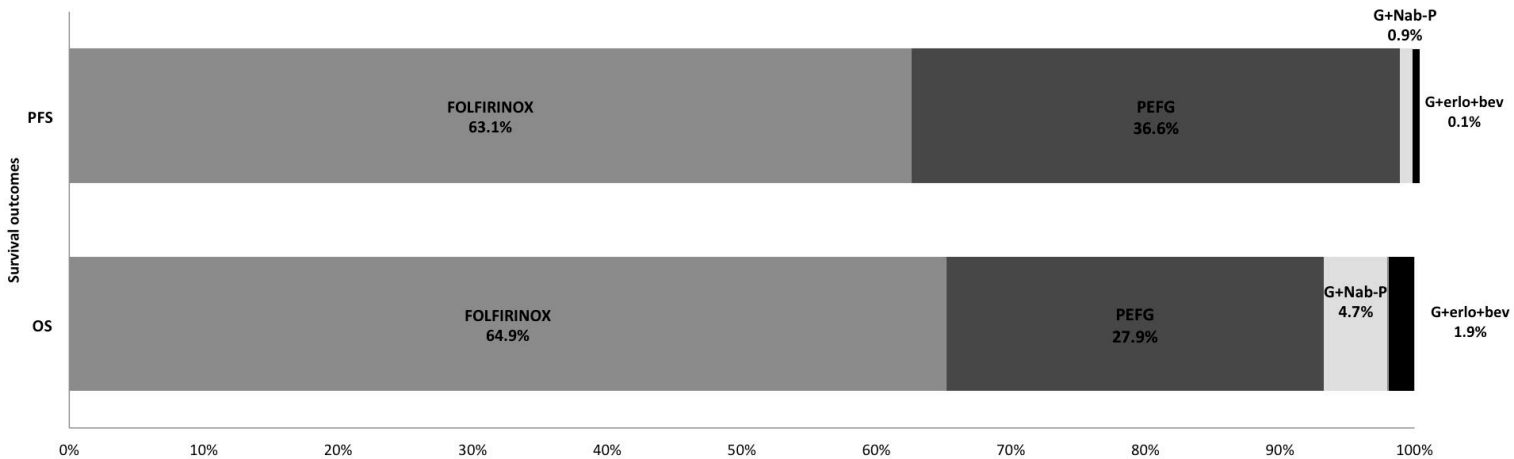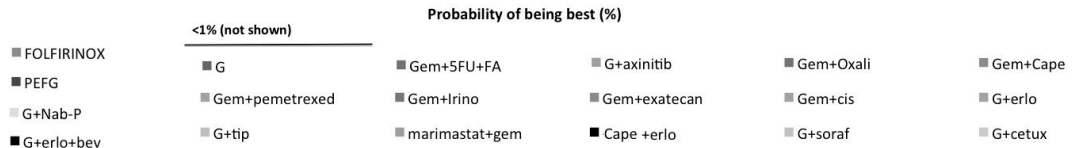

Supplement: MOESM2 [file 9466952]
